# Supplementary material
Source: MDPI journal article supplement (https://www.mdpi.com/1660-4601/11/5/4799)
Supplement: s1 [file s1]

## **Correction of Acknowledgments**

In the original published version of this paper we did not correctly and fully acknowledge our financial support. The acknowledgment is hereby additionally published as follows.

This study was supported by the National Natural Science Foundation of China (Project No. 41371427/D0108 and 41271455/D0108) and the Fundamental Research Funds for the Central Universities (Project No. 201120502020005 and 2042014kf0282). This study was also supported by the Government Support Item Foundation of Shenzhen (Project No. 201201017 major project, Medical and Health Care Class; Project No. JCYJ20130329164302637).
